# Supplementary material
Source: Springer Nature journal article supplement (https://www.springermedizin.de/resource/supplementary/12865_2014_581_MOESM1_ESM.pdf/9428282)
Supplement: MOESM1 [file 9428282]

**Supplementary Table 1. Analysis of variance.**

| Item                      | Fig         | Effects for experiment's conditions    | P value |
|---------------------------|-------------|----------------------------------------|---------|
| IL-1 $\beta$              | 1A          | Control, TL2937, TL2766                | <0.05   |
| IL-8                      | 1A          | Control, TL2937, TL2766                | <0.05   |
| IL-6                      | 1A          | Control, TL2937, TL2766                | N.S.    |
| MCP-1                     | 1A          | Control, TL2937, TL2766                | <0.05   |
| TGF- $\beta$              | 1A          | Control, TL2937, TL2766                | <0.05   |
| IL-1 $\beta$              | 1B          | Control, TL2937, TL2766                | <0.05   |
| IL-6                      | 1B          | Control, TL2937, TL2766                | N.S.    |
| IFN- $\gamma$             | 1B          | Control, TL2937, TL2766                | N.S.    |
| IL-10                     | 1B          | Control, TL2937, TL2766                | <0.05   |
| TGF- $\beta$              | 1B          | Control, TL2937, TL2766                | <0.05   |
| MHC-II (CD11R1 high)      | 2           | Control, TL2937, TL2766                | <0.05   |
| CD80/86 (CD11R1 high)     | 2           | Control, TL2937, TL2766                | <0.05   |
| IL-10(CD11R1 high)        | 2           | Control, TL2937, TL2766                | <0.05   |
| MHC-II (CD11R1 normal)    | 2           | Control, TL2937, TL2766                | <0.05   |
| CD80/86 (CD11R1 normal)   | 2           | Control, TL2937, TL2766                | <0.05   |
| IL-10 (CD11R1 normal)     | 2           | Control, TL2937, TL2766                | <0.05   |
| MHC-II (CD11R1 low)       | 2           | Control, TL2937, TL2766                | N.S.    |
| CD80/86 (CD11R1 low)      | 2           | Control, TL2937, TL2766                | N.S.    |
| IL-10 (CD11R1 low)        | 2           | Control, TL2937, TL2766                | N.S.    |
| IL-1 $\beta$              | 3A          | ETEC control, TL2937+ETEC, TL2766+ETEC | <0.05   |
| IL-8                      | 3A          | ETEC control, TL2937+ETEC, TL2766+ETEC | <0.05   |
| IL-6                      | 3A          | ETEC control, TL2937+ETEC, TL2766+ETEC | <0.05   |
| MCP-1                     | 3A          | ETEC control, TL2937+ETEC, TL2766+ETEC | <0.05   |
| TGF- $\beta$              | 3A          | ETEC control, TL2937+ETEC, TL2766+ETEC | <0.05   |
| IL-1 $\beta$              | 3B          | ETEC control, TL2937+ETEC, TL2766+ETEC | <0.05   |
| IL-6                      | 3B          | ETEC control, TL2937+ETEC, TL2766+ETEC | N.S.    |
| IFN- $\gamma$             | 3B          | ETEC control, TL2937+ETEC, TL2766+ETEC | <0.05   |
| IL-10                     | 3B          | ETEC control, TL2937+ETEC, TL2766+ETEC | <0.05   |
| TGF- $\beta$              | 3B          | ETEC control, TL2937+ETEC, TL2766+ETEC | N.S.    |
| MHC-II (CD11R1 high)      | 4           | ETEC control, TL2937+ETEC, TL2766+ETEC | <0.05   |
| CD80/86 (CD11R1 high)     | 4           | ETEC control, TL2937+ETEC, TL2766+ETEC | <0.05   |
| IL-10(CD11R1 high)        | 4           | ETEC control, TL2937+ETEC, TL2766+ETEC | <0.05   |
| MHC-II (CD11R1 normal)    | 4           | ETEC control, TL2937+ETEC, TL2766+ETEC | <0.05   |
| CD80/86 (CD11R1 normal)   | 4           | ETEC control, TL2937+ETEC, TL2766+ETEC | <0.05   |
| IL-10 (CD11R1 normal)     | 4           | ETEC control, TL2937+ETEC, TL2766+ETEC | <0.05   |
| MHC-II (CD11R1 low)       | 4           | ETEC control, TL2937+ETEC, TL2766+ETEC | <0.05   |
| CD80/86 (CD11R1 low)      | 4           | ETEC control, TL2937+ETEC, TL2766+ETEC | N.S.    |
| IL-10 (CD11R1 low)        | 4           | ETEC control, TL2937+ETEC, TL2766+ETEC | <0.05   |
| MKP-1                     | 5A          | Control, TL2937, TL2766                | <0.05   |
| Bcl-3                     | 5A          | Control, TL2937, TL2766                | <0.05   |
| A20                       | 5A          | Control, TL2937, TL2766                | <0.05   |
| SIGIRR                    | 5B          | Control, TL2937, TL2766                | N.S.    |
| IRAK-M                    | 5B          | Control, TL2937, TL2766                | N.S.    |
| Bcl-3                     | 5B          | Control, TL2937, TL2766                | <0.05   |
| Body weight(24wk)         | 6           | Control, Medium, TL2937, TL2766        | <0.05   |
| Plasma CRP                | 6           | Control, Medium, TL2937, TL2766        | <0.05   |
| Plasma ACA                | 6           | Control, Medium, TL2937, TL2766        | N.S.    |
| Carcass weight            | 7           | Control, Medium, TL2937, TL2766        | <0.05   |
| Carcass backfat thickness | 7           | Control, Medium, TL2937, TL2766        | <0.05   |
| Unsaturated fatty acid    | 7           | Control, Medium, TL2937, TL2766        | N.S.    |
| Tenderness                | 8           | Control, Medium, TL2937, TL2766        | <0.05   |
| Juicy                     | 8           | Control, Medium, TL2937, TL2766        | <0.05   |
| Palatability              | 8           | Control, Medium, TL2937, TL2766        | <0.05   |
| Plasma FFA                | Suppl. Fig1 | Control, Medium, TL2937, TL2766        | N.S.    |
| Plasma Glucose            | Suppl. Fig1 | Control, Medium, TL2937, TL2766        | N.S.    |
| Plasma TG                 | Suppl. Fig1 | Control, Medium, TL2937, TL2766        | N.S.    |
| Plasma TC                 | Suppl. Fig2 | Control, Medium, TL2937, TL2766        | N.S.    |
| Blood leucocytes          | Suppl. Fig2 | Control, Medium, TL2937, TL2766        | N.S.    |
| Granulocytes/Lymphocytes  | Suppl. Fig2 | Control, Medium, TL2937, TL2766        | N.S.    |
| Phagocytes activity       | Suppl. Fig2 | Control, Medium, TL2937, TL2766        | N.S.    |
| Blood antibodies          | Suppl. Fig2 | Control, Medium, TL2937, TL2766        | N.S.    |
